# Supplementary material for: Efficacy and safety of first-line osimertinib treatment and postprogression patterns of care in patients with epidermal growth factor receptor activating mutation-positive advanced non-small cell lung cancer (Reiwa study): study protocol of a multicentre, real-world observational study
Source: PubMed Central journal article supplement — BMJ Open. 2022 Jan 4;12(1):e046451. doi: 10.1136/bmjopen-2020-046451 (PMC8728446; doi:10.1136/bmjopen-2020-046451), 2022-01-04

# BMJ Open

BMJ Open is committed to open peer review. As part of this commitment we make the peer review history of every article we publish publicly available.

When an article is published we post the peer reviewers' comments and the authors' responses online. We also post the versions of the paper that were used during peer review. These are the versions that the peer review comments apply to.

The versions of the paper that follow are the versions that were submitted during the peer review process. They are not the versions of record or the final published versions. They should not be cited or distributed as the published version of this manuscript.

BMJ Open is an open access journal and the full, final, typeset and author-corrected version of record of the manuscript is available on our site with no access controls, subscription charges or pay-per-view fees (<http://bmjopen.bmj.com>).

If you have any questions on BMJ Open's open peer review process please email [info.bmjopen@bmj.com](mailto:info.bmjopen@bmj.com)

# BMJ Open

**Efficacy and safety of first-line osimertinib treatment and post-progression patterns of care in patients with epidermal growth factor receptor activating mutation-positive advanced non-small-cell lung cancer (Reiwa study): design and rationale of a multicenter, real-world observational study**

|                               |                                                                                                                                                                                                                                                                                                                                                                                                                                                                                                                                                                                                                                                                                                                                                                                                                                                                                                                                                                                                                                                                                       |
|-------------------------------|---------------------------------------------------------------------------------------------------------------------------------------------------------------------------------------------------------------------------------------------------------------------------------------------------------------------------------------------------------------------------------------------------------------------------------------------------------------------------------------------------------------------------------------------------------------------------------------------------------------------------------------------------------------------------------------------------------------------------------------------------------------------------------------------------------------------------------------------------------------------------------------------------------------------------------------------------------------------------------------------------------------------------------------------------------------------------------------|
| Journal:                      | <i>BMJ Open</i>                                                                                                                                                                                                                                                                                                                                                                                                                                                                                                                                                                                                                                                                                                                                                                                                                                                                                                                                                                                                                                                                       |
| Manuscript ID                 | bmjopen-2020-046451                                                                                                                                                                                                                                                                                                                                                                                                                                                                                                                                                                                                                                                                                                                                                                                                                                                                                                                                                                                                                                                                   |
| Article Type:                 | Protocol                                                                                                                                                                                                                                                                                                                                                                                                                                                                                                                                                                                                                                                                                                                                                                                                                                                                                                                                                                                                                                                                              |
| Date Submitted by the Author: | 06-Dec-2020                                                                                                                                                                                                                                                                                                                                                                                                                                                                                                                                                                                                                                                                                                                                                                                                                                                                                                                                                                                                                                                                           |
| Complete List of Authors:     | <p>Watanabe, Kageaki; Tokyo Metropolitan Cancer and Infectious Diseases Center Komagome Hospital, Thoracic Oncology and Respiratory Medicine<br/>Yoh, Kiyotaka; National Cancer Center-Hospital East, Department of Thoracic Oncology<br/>Hosomi, Yukio; Tokyo Metropolitan Cancer and Infectious Diseases Center Komagome Hospital, Department of Thoracic Oncology and Respiratory Medicine<br/>Usui, Kazuhiro; NTT Medical Center Tokyo, Respiratory Medicine<br/>Naka, Go; National Center for Global Health and Medicine, Respiratory Medicine<br/>Kishi, Kazuma ; Toho University Faculty of Medicine Graduate School of Medicine, Department of Respiratory Medicine<br/>Uemura, Kohei; The University of Tokyo Interfaculty Initiative in Information Studies Graduate School of Interdisciplinary Information Studies, Department of Biostatistics and Bioinformatics<br/>Ohashi, Yasuo; Chuo University, Department of Integrated Science and Engineering for Sustainable Society<br/>Kunitoh, Hideo; Japanese Red Cross Medical Center, Department of Medical Oncology</p> |
| Keywords:                     | ONCOLOGY, Respiratory tract tumours < ONCOLOGY, Clinical trials < THERAPEUTICS                                                                                                                                                                                                                                                                                                                                                                                                                                                                                                                                                                                                                                                                                                                                                                                                                                                                                                                                                                                                        |
|                               |                                                                                                                                                                                                                                                                                                                                                                                                                                                                                                                                                                                                                                                                                                                                                                                                                                                                                                                                                                                                                                                                                       |

SCHOLARONE™  
Manuscripts

1  
2  
3  
4  
5  
6  
7  
8  
9  
10  
11  
12  
13  
14  
15  
16  
17  
18  
19  
20  
21  
22  
23  
24  
25  
26  
27  
28  
29  
30  
31  
32  
33  
34  
35  
36  
37  
38  
39  
40  
41  
42  
43  
44  
45  
46  
47  
48  
49  
50  
51  
52  
53  
54  
55  
56  
57  
58  
59  
60

1 **Title page**

2

3 *Title*

4 Efficacy and safety of first-line osimertinib treatment and post-progression patterns of  
5 care in patients with epidermal growth factor receptor activating mutation-positive  
6 advanced non-small-cell lung cancer (Reiwa study): design and rationale of a multicenter,  
7 real-world observational study

8

9 *The names of the authors*

10 Kageaki Watanabe<sup>1</sup>

11 Kiyotaka Yoh<sup>2</sup>

12 Yukio Hosomi<sup>1</sup>

13 Kazuhiro Usui<sup>3</sup>

14 Go Naka<sup>4</sup>

15 Kazuma Kishi<sup>5</sup>

16 Kohei Uemura<sup>6</sup>

17 Yasuo Ohashi<sup>7</sup>

18 Hideo Kunitoh<sup>8</sup>

19

20

21 *The affiliations of the authors*

22 <sup>1</sup>Department of Thoracic Oncology and Respiratory Medicine, Tokyo Metropolitan  
23 Cancer and Infectious Diseases Center Komagome Hospital, Bunkyo, Tokyo 113-8677,  
24 Japan.

1  
2  
3  
4  
5  
6 25  
7

8 26 <sup>2</sup>Department of Thoracic Oncology, National Cancer Center Hospital East, Kashiwa,  
9 Chiba 277-8577, Japan.  
10  
11  
12

13 28

15 29 <sup>3</sup>Respiratory Medicine, NTT Medical Center Tokyo, Shinagawa, Tokyo 141-0022, Japan.  
16  
17

18 30

19 31 <sup>4</sup>Department of Respiratory Medicine, National Center for Global Health and Medicine,  
20 Shinjuku, Tokyo 162-8655, Japan.  
21  
22

23 32  
24 33

26 34 <sup>5</sup>Department of Respiratory Medicine, Toho University Omori Medical Center, Ota, Tokyo  
27 143-8541, Japan.  
28  
29

30 35  
31 36

33 37 <sup>6</sup>Department of Biostatistics and Bioinformatics, The Interfaculty Initiative in Information  
34 Studies, The University of Tokyo, Bunkyo, Tokyo 113-8655, Japan.  
35  
36

37 38  
38 39

40 40 <sup>7</sup>Department of Integrated Science and Engineering for Sustainable Society, Chuo  
41 University, Bunkyo, Tokyo 112-8551, Japan.  
42  
43

44 41  
45 42

46 43 <sup>8</sup>Department of Chemotherapy, Japan Red Cross Medical Center, Shibuya, Tokyo 150-  
47 8935, Japan.  
48  
49

50 44  
51 45

52 46  
53 47

55 48 *Address for corresponding author*

56 49  
57 50  
58 51  
59 52  
60 53  
60 54  
60 55  
60 56  
60 57  
60 58  
60 59  
60 60  
60 61  
60 62  
60 63  
60 64  
60 65  
60 66  
60 67  
60 68  
60 69  
60 70  
60 71  
60 72  
60 73  
60 74  
60 75  
60 76  
60 77  
60 78  
60 79  
60 80  
60 81  
60 82  
60 83  
60 84  
60 85  
60 86  
60 87  
60 88  
60 89  
60 90  
60 91  
60 92  
60 93  
60 94  
60 95  
60 96  
60 97  
60 98  
60 99  
60 100

60 48 Kageaki Watanabe, MD.

1  
2  
3  
4  
5  
6 49 Department of Thoracic Oncology and Respiratory Medicine, Tokyo Metropolitan Cancer

7  
8 50 and Infectious Diseases Center Komagome Hospital, Bunkyo, Tokyo 113-8677, Japan.

9  
10 51 E-mail: kageakiwatanabe@cick.jp; Tel: 03-3823-2101; Fax: 03-3823-5433

11  
12  
13 52

14  
15 53 Words: 3353

16  
17 54

18  
19 55 Figures: 1

20  
21  
22 56

23  
24 57 **Keywords:** Osimertinib, EGFR-TKI, progression pattern, subsequent treatment,

25  
26 58 adherence, real-world data

27  
28  
29 59  
30  
31  
32  
33  
34  
35  
36  
37  
38  
39  
40  
41  
42  
43  
44  
45  
46  
47  
48  
49  
50  
51  
52  
53  
54  
55  
56  
57  
58  
59  
60

1  
2  
3  
4  
5  
6 **60 ABSTRACT**

7  
8 **61 Introduction:** Osimertinib, a third-generation epidermal growth factor receptor  
9  
10 **62 (EGFR)tyrosine kinase inhibitor (TKI), is widely used as the first-line treatment for EGFR**  
11  
12 **63 mutation-positive non-small cell lung cancer (NSCLC). Nevertheless, most cases**  
13  
14 **64 ultimately acquire resistance to osimertinib ultimately emerges, and no effective**  
15  
16 **65 treatment has been currently established for cases having progressive disease (PD) with**  
17  
18 **66 osimertinib. In clinical practice, EGFR-TKI therapy could be continued beyond RECIST**  
19  
20 **67 (response evaluation criteria in solid tumors)-defined PD cases when they are clinically**  
21  
22 **68 stable. Currently, the progression pattern of osimertinib and criteria for identifying**  
23  
24 **69 patients who might benefit from osimertinib beyond PD are unknown. In addition, the**  
25  
26 **70 efficacy and safety of osimertinib as the first-line treatment in real-world clinical practice**  
27  
28 **71 remain unclear in Japan. This multicenter study was designed to evaluate the real-world**  
29  
30 **72 data on first-line osimertinib and its post-treatment.**  
31  
32  
33  
34  
35  
36

37 **74 Methods and analysis:** The study enrolls patients with EGFR mutation-positive,  
38  
39 **75 advanced or recurrent NSCLC who received EGFR-TKI as the first-line therapy after**  
40  
41 **76 September 1, 2018, from October 2019 to August 2020, and those started on osimertinib**  
42  
43 **77 will be followed up until August 2022. We will evaluate the efficacy and safety of the first-**  
44  
45 **78 line osimertinib treatment, adherence to it, progression patterns on RECIST PD, and**  
46  
47 **79 subsequent treatment.**  
48  
49  
50

51 **80**  
52  
53 **81 Ethics and dissemination:** All participating patients will provide written informed  
54  
55 **82 consent before entering the study. The protocol, amendments, and patients' informed**  
56  
57 **83 consent forms will be approved before study commencement by the institutional review**  
58  
59  
60

1  
2  
3  
4  
5  
6 84 board or independent ethics committee at each participation site (Lead Ethics Committee.  
7  
8 85 Japan Red Cross Medical Center (26/04/2019, Order No. 976)) Patients will be  
9  
10 86 anonymized before registration into the study and their anonymized data will be collected  
11  
12 87 from the case report form. The results of this study will be presented at the national and  
13  
14 88 international conferences and submitted for publication.  
15  
16  
17  
18  
19

20 90 **Trial registration number:** UMIN000038683  
21  
22 91

23  
24 92 **Keywords:** Osimertinib, EGFR-TKI, progression pattern, subsequent treatment,  
25  
26 93 adherence, real-world data  
27  
28  
29  
30  
31  
32  
33  
34  
35  
36  
37

### 38 98 **Strengths and limitations of this study**

- 39  
40 99 •The strength of this study is that it is the first large, multicenter study in Japan to  
41  
42 100 investigate osimertinib as the first-line treatment in real-world clinical practice.  
43  
44 101 •This study confirms the progression pattern of osimertinib and examines the optimal  
45  
46 102 subsequent treatment.  
47  
48 103 •The factors that make osimertinib less effective will be analyzed by identifying  
49  
50 104 medication adherence.  
51  
52 105 •The classification of the progression pattern in this study is yet to be validated.  
53  
54 106 •End points with small number of events might not be adequately analyzed.  
55  
56  
57  
58  
59  
60

1  
2  
3  
4  
5  
6 108 **TEXT**

7  
8 109 **INTRODUCTION**

9  
10 110 Lung cancer is the most leading cause of cancer deaths in developed countries,  
11 including Japan. In Japan, non-small cell lung cancer (NSCLC) accounts for  
12 approximately 85% of all lung cancers, and among non-small cell cancers, approximately  
13 111 approximately 85% of all lung cancers, and among non-small cell cancers, approximately  
14 112 45% of adenocarcinomas are known to have activating mutations of the epidermal  
15 113 growth factor receptor (EGFR) gene. [1] Patients with advanced or recurrent NSCLC with  
16 114 EGFR mutations have been reported to be highly responsive to first- and second-  
17 115 generation EGFR-tyrosine kinase inhibitors (TKIs); however, they become resistant to  
18 116 EGFR-TKIs, and the median progression-free survival with EGFR-TKI is approximately  
19 117 9–14 months.[2-5]

20 118  
21 119 Notably, approximately half of the resistance was determined to be because of the  
22 120 acquired T790M mutation, [6] and Osimertinib, a third-generation EGFR-TKI, was noted  
23 121 to be effective against T790M mutation-positive lung cancer and was initially established  
24 122 as the standard treatment for T790M mutation-positive lung cancer.[7] More recently,  
25 123 osimertinib has been shown to provide a significantly longer progression-free survival  
26 124 (PFS) and overall survival (OS) than the first-generation EGFR-TKI as the first-line  
27 125 treatment for EGFR mutation-positive NSCLC, which has been noted to be more  
28 126 effective and provided a longer PFS than the second-generation EGFR-TKI. [8,9]  
29 127 Currently, osimertinib is widely used as the first-line treatment for EGFR mutation-  
30 128 positive NSCLC with or without T790M mutation.

31 129 We have previously studied EGFR mutation-positive NSCLC in Japanese patients  
32 130 treated with first- and second-generation EGFR-TKIs, such as gefitinib, erlotinib, and  
33 131 afatinib after being diagnosed as progressive disease (PD) per the RECIST criteria. [10]  
34  
35  
36  
37  
38  
39  
40  
41  
42  
43  
44  
45  
46  
47  
48  
49  
50  
51  
52  
53  
54  
55  
56  
57  
58  
59  
60



1  
2  
3  
4  
5  
6 132 In that study, when RECIST PD was determined, several patients were not clinically PD,  
7  
8 133 and 35% of patients continued to receive EGFR-TKI. The median time from RECIST PD  
9  
10 134 to clinical PD or discontinuation of EGFR-TKI was 5 months, and no major differences  
11  
12 135 were observed regarding OS or survival after PD with RECIST related to continuing  
13  
14 136 EGFR-TKI treatment beyond PD than stopping EGFR-TKI treatment during RECIST PD.  
15  
16 137 Because several patients are clinically stable even after being diagnosed as RECIST  
17  
18 138 PD, EGFR-TKI therapy is often continued beyond PD in clinical practice. Moreover, it  
19  
20 139 has been reported that the addition of radiotherapy to EGFR-TKI could have favorable  
21  
22 140 outcomes, [11-15] if the progression site is limited to brain metastases only. [16,17]  
23  
24  
25

26 141 Most cases receiving osimertinib also ultimately acquire resistance to it, with the  
27  
28 142 median PFS of 19 months. [8] However, currently, no effective treatment has been  
29  
30 143 established for PD after osimertinib. In the Japanese subset of the FLAURA study, PFS  
31  
32 144 was prolonged with osimertinib compared to first-generation TKIs, but its initial  
33  
34 145 superiority in OS disappeared in the middle of the curve, which may be because of the  
35  
36 146 post-treatment effect of the first-line TKIs. [18]  
37  
38  
39

40 147 Clinicians have to decide when observing PD to osimertinib whether to discontinue or  
41  
42 148 continue the drug, or to switch to cytotoxic anticancer drug. Hence, information regarding  
43  
44 149 the progression pattern at the time of PD would be useful in deciding the optimal  
45  
46 150 treatment after osimertinib resistance. Progression patterns to TKIs could be divided into  
47  
48 151 progression of brain metastasis alone, progression of oligometastasis, systemic  
49  
50 152 progression,[19] progression on imaging alone, and clinical PD.[10] Per the former  
51  
52 153 classification, patients with brain metastasis alone or oligometastatic progression could  
53  
54 154 continue osimertinib treatment with the addition of local therapy, [16,17] and in the latter  
55  
56 155 classification, patients without clinical PD might continue osimertinib treatment beyond  
57  
58  
59  
60

1  
2  
3  
4  
5  
6 156 PD. However, currently, the progression patterns of osimertinib are not investigated, and  
7  
8 157 neither the clinical relevance of “osimertinib beyond PD” nor criteria for identifying  
9  
10 158 patients who would benefit from it is known. In addition, the efficacy and safety of  
11  
12 159 osimertinib as the first-line treatment in real-world clinical practice remains to be fully  
13  
14 160 established in Japan, as is shown in the FLAURA Japanese subset data.

15  
16  
17 161 In this study, we will survey the choice of EGFR-TKIs used as the first-line therapy in  
18  
19 162 patients with advanced or recurrent EGFR mutation-positive NSCLC, and evaluate the  
20  
21 163 efficacy and safety of osimertinib treatment in clinical practice, the progression patterns  
22  
23 164 in RECIST PD with osimertinib, and subsequent treatment. In addition, we will examine  
24  
25 165 the factors that make osimertinib less effective by identifying medication adherence.  
26  
27  
28 166 [20,21]

29  
30  
31 167

## 32 33 168 **METHODS and ANALYSIS**

### 34 35 169 **Design**

36  
37 170 This observational study is a multicenter, prospective cohort study involving patients  
38  
39 171 with EGFR mutation-positive advanced or recurrent NSCLC in Japan. The study does  
40  
41 172 not include any particular intervention, patients will be managed using routine clinical  
42  
43 173 care, and all treatments and examinations will be performed as in regular practice. The  
44  
45 174 study will periodically survey and collect data on the registered patients using medical  
46  
47 175 records. Overall, 35 institutions in Japan, including cancer centers, university hospitals,  
48  
49 176 and community hospitals, participated in the study.

50  
51  
52 177

### 53 54 178 **Patient and public involvement**

55  
56  
57 179 There is no patient and public involved in the study. In principle, the results of the study  
58  
59  
60

1  
2  
3  
4  
5  
6 180 will be disclosed if the research participant wishes to disclose the results of the study.  
7

8 181  
9

10 182 **Study period**

11  
12  
13 183 The study will be conducted from October 2019 to June 2023. Registration will take  
14  
15 184 place from the approval date of ethical review at each institution to August 2020. The  
16  
17 185 follow-up period will extend until August 2022 (2 years after the last patient was enrolled).  
18  
19 186 Data entry and analysis will be completed by June 2023 (10 months after the last patient  
20  
21 187 is observed).  
22  
23

24 188

25  
26 189 **Participants**

27  
28 190 Patients will be included in the study if they are aged  $\geq 20$  years and have advanced  
29  
30 191 or recurrent metastatic NSCLC (the stage will be defined based on the UICC  
31  
32 192 International Union for Tumors Lung Classifications [2017, 8th Edition]) that is EGFR  
33  
34 193 activating mutation-positive. Notably, any type of EGFR mutation will be acceptable. In  
35  
36 194 addition to Exon 19 deletion and Exon 21 L858R susceptibility gene mutations (common  
37  
38 195 mutations), rare EGFR mutations (uncommon mutations) will be eligible. Moreover, an  
39  
40 196 additional eligibility criterion will be for patients to have started their first EGFR-TKI  
41  
42 197 treatment on or after September 1, 2018.  
43  
44  
45

46 198 Regarding EGFR-TKI treatment, patients who used anticancer drugs as local therapy  
47  
48 199 like pleurodesis, patients treated with cytotoxic chemotherapy as prior therapy, patients  
49  
50 200 treated with EGFR-TKIs and other anticancer drugs or angiogenesis inhibitors, patients  
51  
52 201 who were primarily treated with EGFR-TKI as monotherapy and alternating between  
53  
54 202 EGFR-TKI and other anticancer drugs, and patients who were enrolled in other clinical  
55  
56 203 trials will also be deemed eligible.  
57  
58  
59  
60

1  
2  
3  
4  
5  
6 204 Patients who had started EGFR-TKI treatment before September 1, 2018, and patients  
7  
8 205 deemed inappropriate for inclusion by each investigator will be excluded.  
9

10 206

### 11 207 **Research procedures**

12  
13  
14  
15 208 The investigators will select patient candidates, obtain written informed consent,  
16  
17 209 complete the case registration form, and fax it to the data center. The data center will  
18  
19 210 verify the patient's eligibility and register the patient based on the case registration form.

20  
21 211 The patients will be classified into two groups based on the data provided at enrollment.  
22  
23 212 One group will comprise patients treated or to be treated with EGFR-TKI other than  
24  
25 213 osimertinib, and patients treated or to be treated with osimertinib in combination with  
26  
27 214 other anticancer drugs or angiogenesis inhibitors from the beginning of treatment. The  
28  
29 215 other group will comprise patients who started or will start osimertinib monotherapy.  
30  
31 216 Patients who have been receiving combination therapy with other anticancer drugs or  
32  
33 217 angiogenesis inhibitors during the course of osimertinib treatment or who have been  
34  
35 218 receiving replacement therapy with other anticancer drugs will be included in this group  
36  
37 219 provided they were initially treated with osimertinib monotherapy.  
38  
39

40  
41 220 For the first group, the study will be completed at the time of enrollment survey with  
42  
43 221 confirmation of patient characteristics, details of EGFR-TKI therapy, and concomitant  
44  
45 222 drugs before initiation of EGFR-TKI therapy. In the second group, the study will continue  
46  
47 223 survey until the end of the study period. Each survey will include treatment details,  
48  
49 224 concomitant medications, imaging assessments, clinical exacerbations, flare events,  
50  
51 225 adverse event reports, outcomes, and post-treatment details after osimertinib treatment.  
52  
53 226 The investigators will conduct a simultaneous survey once every 6 months, using  
54  
55 227 medical records from enrolled patients. The final survey will be conducted 2 years after  
56  
57  
58  
59  
60

1  
2  
3  
4  
5  
6 228 the last patient was enrolled. The results of each study will be recorded in a continuing  
7  
8 229 case report form for each study and sent to the data center.  
9

10 230 Patient-reported osimertinib compliance survey will be conducted in patients who were  
11  
12 231 started newly on osimertinib since the start of the study. Patients will be given a  
13  
14 232 medication notebook, which they will fill out themselves, and a copy of the notebook will  
15  
16 233 be mailed to the data center 180 days after starting osimertinib with a medication  
17  
18 234 investigation report for each patient.  
19

20  
21 235 All adverse events occurring during osimertinib treatment that are suspected to be  
22  
23 236 related to the treatment will be documented in the continuing case report form, regardless  
24  
25 237 of the severity. In the event of a serious adverse event, the standard reporting protocol  
26  
27 238 of a serious adverse event will be performed appropriately, including reporting to the  
28  
29 239 head of the medical institution and the authorities. In addition to that, the study mandates  
30  
31 240 that the report be emailed to the administrative office within 24 hours and the primary  
32  
33 241 report be emailed to the administrative office within 72 hours, using the “Emergency  
34  
35 242 Adverse Event Notification Form.” Finally, the administrative office will report the serious  
36  
37 243 adverse event to the principal investigator of the study and AstraZeneca through email.  
38  
39

40  
41  
42 244

#### 43 44 245 **Data management and monitoring**

45  
46 246 Data will be centrally managed at the designated data center. Central monitoring will  
47  
48 247 be performed to ensure that the study is conducted safely and in accordance with the  
49  
50 248 protocol.  
51

52  
53 249

#### 54 55 250 **End point**

56  
57 251 This study’s primary endpoint is co-primary endpoint. First primary endpoint is PFS of  
58  
59  
60

1  
2  
3  
4  
5  
6 252 osimertinib, time from the start of osimertinib to RECIST PD, or death from any cause.

7  
8 253 Another primary endpoint is percentage of patients with progression patterns listed below

9  
10 254 when RECIST PD was encountered with osimertinib treatment. This progression pattern

11  
12 255 classification was modified from the paper by Goto Y et al [10]; however, this is yet to be

13  
14 256 fully validated. Progression patterns are classified into nine categories (3 x 3) based on

15  
16 257 progression site and patient status as follows:

17  
18 258 A. Progression patterns based on progression sites

19  
20 259 (A1) Central nervous system only (including brain metastasis and carcinomatous

21  
22 260 meningitis)

23  
24 261 (A2) Oligometastasis (one to three lesions in one organ other than the brain)

25  
26 262 (A3) Progression in multiple organs (except A1 and A2)

27  
28 263 B. Symptoms at exacerbation and exacerbation patterns per the patient's general

29  
30 264 condition

31  
32 265 (B1) Asymptomatic, without progression as defined by B3

33  
34 266 (B2) Symptomatic, without progression as defined by B3

35  
36 267 (B3) Decreased PS or major organ threatening conditions (cancerous lymphangitis, bone

37  
38 268 marrow metastasis, carcinomatous meningitis, hepatic metastasis with hepatic disorder,

39  
40 269 etc.)

41  
42 270 The study has several secondary endpoints, which are listed below.

43  
44 271 1. Response rate of osimertinib in patients with measurable lesions.

45  
46 272 2. OS (time from the start of osimertinib to the date of death, irrespective of cause of

47  
48 273 death).

49  
50 274 3. Percentage of patients who continued or discontinued osimertinib at RECIST PD.

51  
52 275 4. Number and type of drugs prescribed concomitantly with osimertinib (polypharmacy):

- 1  
2  
3  
4  
5  
6 276 oral drugs are classified and aggregated according to the type (gastrointestinal,  
7  
8 277 antihypertensive, diabetic, etc.) and number (less than 5, 5–9, 10, or more).  
9  
10 278 5. Osimertinib adherence (survey of actual conditions using the medication handbook).  
11  
12  
13 279 6. Duration of osimertinib treatment.  
14  
15 280 7. Percentage of patients who experienced flare, defined as rapid disease deterioration  
16  
17 281 within 1 month resulting in hospitalization or death, after discontinuation of osimertinib  
18  
19 282 treatment, except in cases of infections, venous thrombosis, and other causes not  
20  
21 283 directly related to NSCLC exacerbation. [10]  
22  
23  
24 284 8. Percentage of patients receiving concurrent chemotherapy or radiotherapy along with  
25  
26 285 osimertinib after osimertinib PD.  
27  
28 286 9. Percentage of patients who received chemotherapy after discontinuation of  
29  
30 287 osimertinib treatment.  
31  
32  
33 288 10. Percentage of patients re-administered osimertinib after more than 4 weeks of  
34  
35 289 discontinuation (if it is less than 4 weeks, it will be considered to be temporary interruption  
36  
37 290 rather than discontinuation).  
38  
39  
40 291 11. Percentage of patients with advanced or recurrent EGFR mutation-positive NSCLC  
41  
42 292 receiving osimertinib as initial therapy after September 2018 when osimertinib was  
43  
44 293 approved for use in patients with NSCLC untreated with EGFR-TKI in Japan.  
45  
46 294 12. Effects of osimertinib in patients with uncommon EGFR mutations.  
47  
48 295 13. Incidence of grade 3 or higher adverse events with osimertinib treatment.  
49  
50  
51 296 14. Incidence of pneumonitis caused by osimertinib.

52  
53 297 In addition, we will also perform exploratory analysis to investigate the content and  
54  
55 298 efficacy of post-treatment after Osimertinib PD.  
56

57  
58 299  
59  
60

1  
2  
3  
4  
5  
6 300 **Sample size**  
7

8 301 Between September 2018 and August 2020, 700 patients were expected to be  
9  
10 302 enrolled from 50 potential participating institutions. Of the 700 patients, the proportion of  
11  
12 303 osimertinib was estimated to be 70% on average over 2 years, and the number of  
13  
14 304 patients treated with osimertinib was considered to be 500. Based on previous clinical  
15  
16 305 trial data, the median PFS for osimertinib is expected to be about 19 months. The study  
17  
18 306 has a 2-year enrollment period and a follow-up period of 2 years from the last patient's  
19  
20 307 enrollment. Therefore, all 500 patients will be followed up for more than 2 years. For  
21  
22 308 PFS, which is one of the primary endpoints, we would expect events to occur in more  
23  
24 309 than 60% of cases (number of events was 361, assuming a constant rate of enrollment  
25  
26 310 over 2 years, minimum follow-up of 2 years, and an exponential distribution of median  
27  
28 311 PFS of 19 months), and we believe that one of the primary endpoints, that is, the pattern  
29  
30 312 of exacerbations, could be evaluated.  
31  
32  
33  
34  
35  
36

37 314 **Data analysis**  
38

39 315 All efficacy analyses will be based on the full analysis set (and per protocol set for  
40  
41 316 supportive analysis). The results of all statistical analyses will be performed using 95%  
42  
43 317 confidence intervals and two-sided  $p$  values. Final analyses will be performed for all  
44  
45 318 endpoints after the data have been finalized after the final investigation.  
46  
47

48 319 PFS, OS, and duration of osimertinib treatment will be summarized using Kaplan-  
49  
50 320 Meier methods, and 95% confidence interval of median time will be calculated using  
51  
52 321 Brookmeyer and Crowley based on the log-log transformation of survival function. For  
53  
54 322 PFS, we will perform subgroup analyses for the following covariates: gender (male,  
55  
56 323 female), age ( $\geq 65$  years,  $<65$  years), primary disease (clinical stage, histology,  
57  
58  
59  
60



1  
2  
3  
4  
5  
6 324 metastatic organ), smoking history (yes, no), PS (0, 1), types of EGFR mutations,  
7  
8 325 provided there is a certain number of events in each category. Regarding the percentage  
9  
10 326 of patients with nine progression patterns as the primary endpoint, the percentage of  
11  
12 327 response rate and the percentage of patients with various secondary endpoints, the ratio  
13  
14  
15 328 and the 95% confidence interval of Clopper-Pearson will be calculated.  
16

17 329

### 19 330 **Ethics and dissemination**

21 331 This study will be conducted per the principles of the Declaration of Helsinki and the  
22  
23 332 Ethical Guidelines for Medical and Health Research Involving Human Subjects. All  
24  
25 333 participating patients will provide written informed consent before entering the study.  
26  
27 334 However, informed consent will not be required for patients who are dead at the time of  
28  
29 335 registration. The protocol, amendments, and patient informed consent forms will be  
30  
31 336 approved by the institutional review board or the independent ethics committee at each  
32  
33 337 participating site before study commencement. (Lead Ethics Committee. Japan Red  
34  
35 338 Cross Medical Center (26/04/2019, Order No. 976))  
36  
37  
38

39 339 Furthermore, for data management and to ensure patient privacy, patients will be  
40  
41 340 anonymized before registration and their anonymized data will be collected using the  
42  
43 341 case report form. All personnel involved in the study will ensure confidentiality of all  
44  
45 342 participating patients. The anonymization procedure planned is as follows: the  
46  
47 343 investigators at each institution will give each participating patient an original number  
48  
49 344 unique to the institution that is unrelated to the name and hospital ID of the patient, and  
50  
51 345 register the patient in the data center using that original number. Subsequently, the data  
52  
53 346 center will assign a registration number for this study. Each institution will prepare a list  
54  
55 347 of correspondence between the original number of the institution and the registration  
56  
57  
58  
59  
60

1  
2  
3  
4  
5  
6 348 number of this study, which will be strictly controlled by the institution. Enrolled patients  
7  
8 349 are identified and queried using the registration number of this study. Information that  
9  
10 350 can be used by a third party to directly identify a registered patient, such as the medical  
11  
12 351 record numbers in clinical practice or the names and contact details of a registered  
13  
14 352 patient, will not be provided to the data center and not be registered at the data center.  
15  
16  
17 353 Data collected from patients in this study will not be used for any other purpose, and  
18  
19 354 potential information that discloses patient identity will not be published.  
20  
21  
22 355

## 23 24 356 **DISCUSSION**

25  
26 357 This is the first study to evaluate the efficacy and safety of first-line osimertinib in real-  
27  
28 358 world clinical practice in Japan. Moreover, this study will determine the pattern of  
29  
30 359 exacerbation of osimertinib in RECIST PD and investigate and analyze the real-world  
31  
32 360 post-treatment. The study results will help identify the optimal treatment of patients with  
33  
34 361 EGFR mutation-positive NSCLC based on the real-world exacerbation patterns after  
35  
36 362 first-line osimertinib treatment.  
37  
38  
39  
40 363

## 41 42 364 **CONCLUSION**

43  
44 365 The results of this study will be presented at the national and international conferences  
45  
46 366 and will be submitted for publication. We expect that all the data obtained and analyzed  
47  
48 367 by this study will facilitate improved treatment strategies in the future for patients with  
49  
50 368 EGFR mutation-positive lung cancer.  
51  
52  
53 369

1  
2  
3  
4  
5  
6  
7  
8  
9  
10  
11  
12  
13  
14  
15  
16  
17  
18  
19  
20  
21  
22  
23  
24  
25  
26  
27  
28  
29  
30  
31  
32  
33  
34  
35  
36  
37  
38  
39  
40  
41  
42  
43  
44  
45  
46  
47  
48  
49  
50  
51  
52  
53  
54  
55  
56  
57  
58  
59  
60

370 Figure 1 Study schema, EGFR, epidermal growth factor receptor

371

For peer review only

1  
2  
3  
4  
5  
6 372 **Acknowledgments:** The authors thank the Data and Safety Monitoring Committee Junji  
7  
8 373 Furuse and Toshimi Takano; the data center, Hiroshi Otsu and Akemi Yasuhara; and  
9  
10 374 Akira Yamao and Miho Akita of Public Health Research Center Comprehensive Support  
11  
12 375 Project for Oncology Research, the administrative office.  
13  
14  
15 376

16  
17 377 **Contributors:** KW, KY, YH, KU, GN, KK, KU, YO, and HK conceived and designed the  
18  
19 378 study. KW, YH, and HK drafted the protocol of the study. KW, KY, YH, KU, GN, KK, KU,  
20  
21 379 YO, and HK refined the study protocol and study implementation. All authors have read  
22  
23 380 and approved the final version of the manuscript.  
24  
25

26 381

27  
28 382 **Financial Support:** This study is financially supported by AstraZeneca.  
29  
30

31 383

32  
33 384 **Disclaimer:** AstraZeneca will not be directly involved in the data management, source  
34  
35 385 data verification, or the statistical analysis.  
36  
37

38 386

39  
40 387 **Competing interests:** KW, KY, YH, KU, GN, KK, and HK have received personal fees  
41  
42 388 from AstraZeneca. KY and GN have received research grants from AstraZeneca.  
43  
44

44 389

45  
46 390 **Ethics approval:** Institutional review board or independent ethics committee at each  
47  
48 391 participating site. (Lead Ethics Committee. Japan Red Cross Medical Center  
49  
50 392 (26/04/2019, Order No. 976))  
51  
52

53 393

54  
55 394 **Provenance and peer review:** Not commissioned; externally peer reviewed.  
56  
57

58 395  
59  
60

396 **References**

- 397 1. Midha A, Dearden S, McCormack R. EGFR mutation incidence in non-small-cell lung  
398 cancer of adenocarcinoma histology: a systematic review and global map by ethnicity  
399 (mutMapII). *Am J Cancer Res* 2015;5:2892–2911.  
400
- 401 2. Maemondo M, Inoue A, Kobayashi K, et al. Gefitinib or chemotherapy for non-small-  
402 cell lung cancer with mutated EGFR. *N Engl J Med* 2010;362:2380–2388.  
403
- 404 3. Mitsudomi T, Morita S, Yatabe Y, et al: Gefitinib versus cisplatin plus docetaxel in  
405 patients with non-small-cell lung cancer harbouring mutations of the epidermal growth  
406 factor receptor (WJTOG3405): an open label, randomised phase 3 trial. *Lancet Oncol*  
407 2010;11:121–128.  
408
- 409 4. Zhou C, Wu YL, Chen G, et al. Erlotinib versus chemotherapy as first-line treatment  
410 for patients with advanced EGFR mutation-positive non-small-cell lung cancer  
411 (OPTIMAL, CTONG-0802): a multicentre, open-label, randomised, phase 3 study.  
412 *Lancet Oncol* 2011;12:735–742.  
413
- 414 5. Rosell R, Carcereny E, Gervais R, et al. Erlotinib versus standard chemotherapy as  
415 first-line treatment for European patients with advanced EGFR mutation-positive non-  
416 small-cell lung cancer (EURTAC): a multicentre, open-label, randomised phase 3 trial.  
417 *Lancet Oncol* 2012;13:239–246.  
418
- 419 6. Yu HA, Arcila ME, Rekhtman N, et al. Analysis of tumor specimens at the time of

- 1  
2  
3  
4  
5  
6 420 acquired resistance to EGFR-TKI therapy in 155 patients with EGFR-mutant lung  
7  
8 421 cancers. *Clin Cancer Res* 2013;19:2240–2247.  
9  
10 422  
11  
12  
13 423 7. Mok TS, Wu YL, Ahn MJ, et al. Osimertinib or platinum-pemetrexed in EGFR T790M-  
14  
15 424 positive lung cancer. *N Engl J Med* 2017;376:629–640.  
16  
17 425  
18  
19 426 8. Soria JC, Ohe Y, Vansteenkiste J, et al. Osimertinib in untreated EGFR-mutated  
20  
21 427 advanced non-small-cell lung cancer. *New Engl J Med* 2018;378:113–25.  
22  
23 428  
24  
25  
26 429 9. Ramalingam SS, Vansteenkiste J, Planchard D, et al. Overall Survival with  
27  
28 430 Osimertinib in Untreated, EGFR-Mutated Advanced NSCLC. *New Engl J Med*  
29  
30 431 2020;382:41–50.  
31  
32 432  
33  
34  
35 433 10. Goto Y, Tanai C, Yoh K, et al. Continuing EGFR-TKI beyond radiological progression  
36  
37 434 in patients with advanced or recurrent, EGFR mutation-positive non-small-cell lung  
38  
39 435 cancer: An observational study. *ESMO Open* 2017;2:e000214.  
40  
41 436  
42  
43  
44 437 11. Nishie K, Kawaguchi T, Tamiya A, et al. Epidermal growth factor receptor tyrosine  
45  
46 438 kinase inhibitors beyond progressive disease: A retrospective analysis for Japanese  
47  
48 439 patients with activating EGFR mutations. *J Thorac Oncol* 2012;7:1722–1727.  
49  
50 440  
51  
52  
53 441 12. Nishino K, Imamura F, Morita S, et al. A retrospective analysis of 335 Japanese lung  
54  
55 442 cancer patients who responded to initial gefitinib treatment. *Lung Cancer* 2013;82:299–  
56  
57 443 304.  
58  
59  
60

1  
2  
3  
4  
5  
6 444  
7

8 445 13. Nishino M, Cardarella S, Dahlberg SE, et al. Radiographic assessment and  
9  
10 446 therapeutic decisions at RECIST progression in EGFR-mutant NSCLC treated with  
11  
12 447 EGFR tyrosine kinase inhibitors. *Lung Cancer* 2013;79:283–288.  
13  
14

15 448

16  
17 449 14. Lo PC, Dahlberg SE, Nishino M, et al. Delay of treatment change after objective  
18  
19 450 progression on first-line erlotinib in epidermal growth factor receptor-mutant lung cancer.  
20  
21 451 *Cancer* 2015;121:2570–2577.  
22  
23

24 452

25  
26 453 15. Park K, Yu CJ, Kim SW, et al. First-line erlotinib therapy until and beyond response  
27  
28 454 evaluation criteria in solid tumors progression in Asian patients with epidermal growth  
29  
30 455 factor receptor mutation-positive non-small-cell lung cancer: The ASPIRATION Study.  
31  
32 456 *JAMA Oncol* 2016;2:305–312.  
33  
34

35 457

36  
37 458 16. Weickhardt AJ, Scheier B, Burke JM, et al. Local ablative therapy of oligoprogressive  
38  
39 459 disease prolongs disease control by tyrosine kinase inhibitors in oncogene-addicted non-  
40  
41 460 small-cell lung cancer. *J Thorac Oncol* 2012;7:1807–1814.  
42  
43

44 461

45  
46 462 17. Yu HA, Sima CS, Huang J, et al. Local therapy with continued EGFR tyrosine kinase  
47  
48 463 inhibitor therapy as a treatment strategy in EGFR-mutant advanced lung cancers that  
49  
50 464 have developed acquired resistance to EGFR tyrosine kinase inhibitors. *J Thorac Oncol*  
51  
52 465 2013; 8: 346–351.  
53  
54

55 466

56  
57  
58 467 18. Nogami N et al. Osimertinib as first-line therapy for EGFRm advanced NSCLC :  
59  
60

- 1  
2  
3  
4  
5  
6 468 Final FLAURA OS. The 60<sup>th</sup> Annual Meeting of the Japan Lung Cancer Society.  
7  
8 469  
9  
10 470 19. Gandara DR, Li T, Lara PN et al. Acquired resistance to targeted therapies against  
11  
12 471 oncogene-driven non–small-cell lung cancer: approach to subtyping progressive disease  
13  
14 472 and clinical implications. *Clinical Lung Cancer* 2014;15:1–6.  
15  
16 473  
17  
18 474 20. Martin D, Bazeos A, Mahon FX, et al. Adherence is the critical factor for achieving  
19  
20 475 molecular responses in patients with chronic myeloid leukemia who achieve complete  
21  
22 476 cytogenetic responses on imatinib. *J Clin Oncol* 2010;28:2381–2388  
23  
24 477  
25  
26 478 21. Calip GS, Xiang S, Jun DH, et al. Polypharmacy and adherence to adjuvant  
27  
28 479 endocrine therapy for breast cancer. *J Oncol Pract* 2017;13:e451–e462  
29  
30  
31  
32  
33  
34  
35  
36  
37  
38  
39  
40  
41  
42  
43  
44  
45  
46  
47  
48  
49  
50  
51  
52  
53  
54  
55  
56  
57  
58  
59  
60



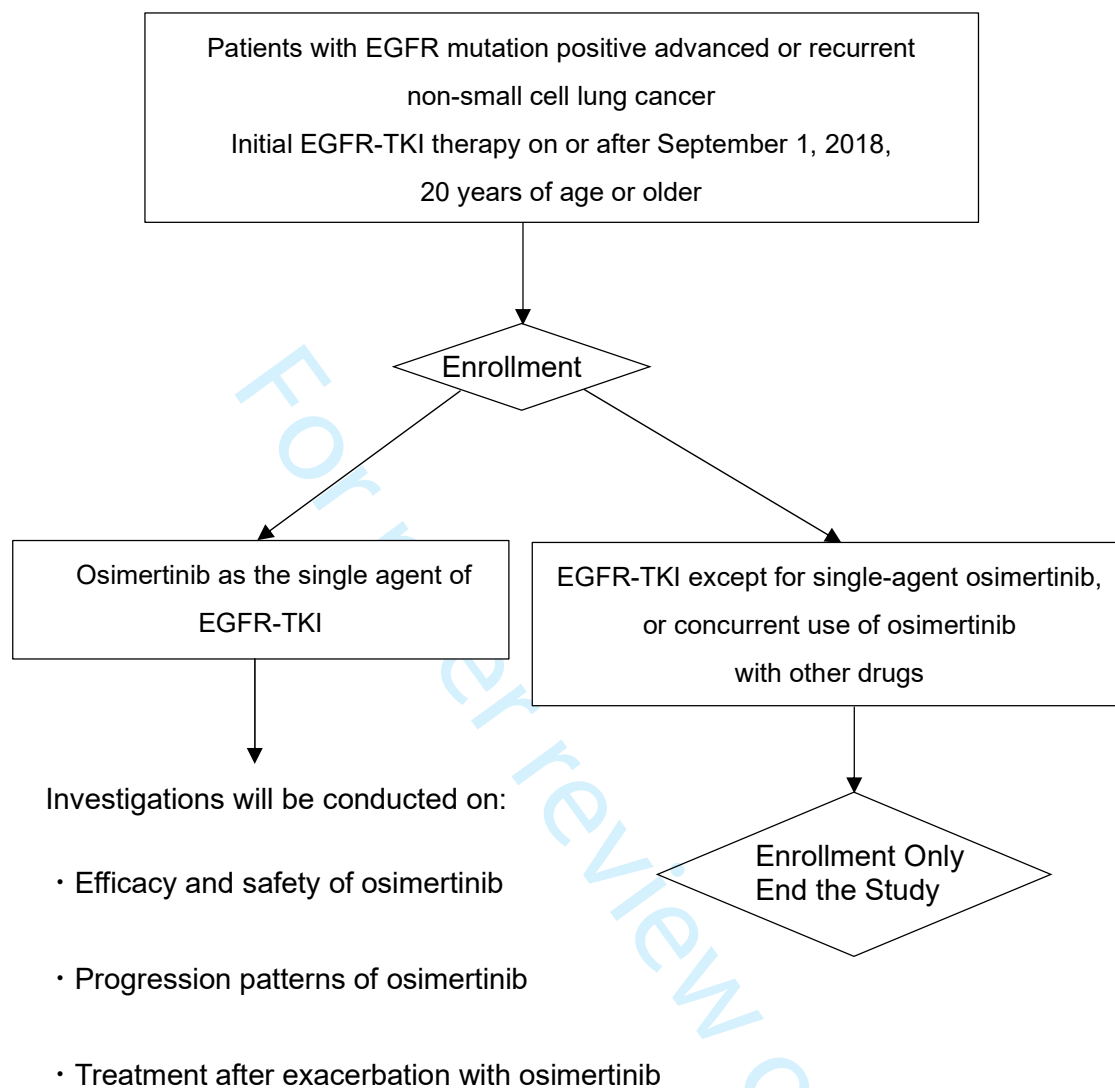

# BMJ Open

**Efficacy and safety of first-line osimertinib treatment and post-progression patterns of care in patients with epidermal growth factor receptor activating mutation-positive advanced non-small-cell lung cancer (Reiwa study): study protocol of a multicenter, real-world observational study**

|                                 |                                                                                                                                                                                                                                                                                                                                                                                                                                                                                                                                                                                                                                                                                                                                                                                                                                                                                                                                                                                                                                                                  |
|---------------------------------|------------------------------------------------------------------------------------------------------------------------------------------------------------------------------------------------------------------------------------------------------------------------------------------------------------------------------------------------------------------------------------------------------------------------------------------------------------------------------------------------------------------------------------------------------------------------------------------------------------------------------------------------------------------------------------------------------------------------------------------------------------------------------------------------------------------------------------------------------------------------------------------------------------------------------------------------------------------------------------------------------------------------------------------------------------------|
| Journal:                        | <i>BMJ Open</i>                                                                                                                                                                                                                                                                                                                                                                                                                                                                                                                                                                                                                                                                                                                                                                                                                                                                                                                                                                                                                                                  |
| Manuscript ID                   | bmjopen-2020-046451.R1                                                                                                                                                                                                                                                                                                                                                                                                                                                                                                                                                                                                                                                                                                                                                                                                                                                                                                                                                                                                                                           |
| Article Type:                   | Protocol                                                                                                                                                                                                                                                                                                                                                                                                                                                                                                                                                                                                                                                                                                                                                                                                                                                                                                                                                                                                                                                         |
| Date Submitted by the Author:   | 08-Jun-2021                                                                                                                                                                                                                                                                                                                                                                                                                                                                                                                                                                                                                                                                                                                                                                                                                                                                                                                                                                                                                                                      |
| Complete List of Authors:       | Watanabe, Kageaki; Tokyo Metropolitan Cancer and Infectious Diseases Center Komagome Hospital, Thoracic Oncology and Respiratory Medicine Yoh, Kiyotaka; National Cancer Center-Hospital East, Department of Thoracic Oncology<br>Hosomi, Yukio; Tokyo Metropolitan Cancer and Infectious Diseases Center Komagome Hospital, Department of Thoracic Oncology and Respiratory Medicine<br>Usui, Kazuhiro; NTT Medical Center Tokyo, Respiratory Medicine Naka, Go; National Center for Global Health and Medicine, Respiratory Medicine<br>Kishi, Kazuma ; Toho University Faculty of Medicine Graduate School of Medicine, Department of Respiratory Medicine<br>Uemura, Kohei; The University of Tokyo Interfaculty Initiative in Information Studies Graduate School of Interdisciplinary Information Studies, Department of Biostatistics and Bioinformatics<br>Ohashi, Yasuo; Chuo University, Department of Integrated Science and Engineering for Sustainable Society<br>Kunitoh, Hideo; Japanese Red Cross Medical Center, Department of Medical Oncology |
| <b>Primary Subject Heading</b>: | Oncology                                                                                                                                                                                                                                                                                                                                                                                                                                                                                                                                                                                                                                                                                                                                                                                                                                                                                                                                                                                                                                                         |
| Secondary Subject Heading:      | Oncology                                                                                                                                                                                                                                                                                                                                                                                                                                                                                                                                                                                                                                                                                                                                                                                                                                                                                                                                                                                                                                                         |
| Keywords:                       | Clinical trials < THERAPEUTICS, ONCOLOGY, RESPIRATORY MEDICINE (see Thoracic Medicine)                                                                                                                                                                                                                                                                                                                                                                                                                                                                                                                                                                                                                                                                                                                                                                                                                                                                                                                                                                           |
|                                 |                                                                                                                                                                                                                                                                                                                                                                                                                                                                                                                                                                                                                                                                                                                                                                                                                                                                                                                                                                                                                                                                  |

SCHOLARONE™  
Manuscripts

1  
2  
3  
4  
5  
6  
7  
8  
9  
10  
11  
12  
13  
14  
15  
16  
17  
18  
19  
20  
21  
22  
23  
24  
25  
26  
27  
28  
29  
30  
31  
32  
33  
34  
35  
36  
37  
38  
39  
40  
41  
42  
43  
44  
45  
46  
47  
48  
49  
50  
51  
52  
53  
54  
55  
56  
57  
58  
59  
60

1 **Title page**

2

3 *Title*

4 Efficacy and safety of first-line osimertinib treatment and post-progression patterns of  
5 care in patients with epidermal growth factor receptor activating mutation-positive  
6 advanced non-small-cell lung cancer (Reiwa study): study protocol of a multicenter, real-  
7 world observational study

8

9 *The names of the authors*

10 Kageaki Watanabe<sup>1</sup>

11 Kiyotaka Yoh<sup>2</sup>

12 Yukio Hosomi<sup>1</sup>

13 Kazuhiro Usui<sup>3</sup>

14 Go Naka<sup>4</sup>

15 Kazuma Kishi<sup>5</sup>

16 Kohei Uemura<sup>6</sup>

17 Yasuo Ohashi<sup>7</sup>

18 Hideo Kunitoh<sup>8</sup>

19

20

21 *The affiliations of the authors*

22 <sup>1</sup>Department of Thoracic Oncology and Respiratory Medicine, Tokyo Metropolitan  
23 Cancer and Infectious Diseases Center Komagome Hospital, Bunkyo, Tokyo 113-8677,  
24 Japan.

1  
2  
3  
4  
5  
6 25  
7

8 26 <sup>2</sup>Department of Thoracic Oncology, National Cancer Center Hospital East, Kashiwa,  
9 Chiba 277-8577, Japan.  
10  
11  
12

13 28

15 29 <sup>3</sup>Respiratory Medicine, NTT Medical Center Tokyo, Shinagawa, Tokyo 141-0022, Japan.  
16  
17

18 30

19 31 <sup>4</sup>Department of Respiratory Medicine, National Center for Global Health and Medicine,  
20 Shinjuku, Tokyo 162-8655, Japan.  
21  
22

23 32  
24 33

26 34 <sup>5</sup>Department of Respiratory Medicine, Toho University Omori Medical Center, Ota, Tokyo  
27 143-8541, Japan.  
28  
29

30 35  
31 36

33 37 <sup>6</sup>Department of Biostatistics and Bioinformatics, The Interfaculty Initiative in Information  
34 Studies, The University of Tokyo, Bunkyo, Tokyo 113-8655, Japan.  
35  
36

37 38  
38 39

40 40 <sup>7</sup>Department of Integrated Science and Engineering for Sustainable Society, Chuo  
41 University, Bunkyo, Tokyo 112-8551, Japan.  
42  
43

44 41  
45 42

46 43 <sup>8</sup>Department of Chemotherapy, Japan Red Cross Medical Center, Shibuya, Tokyo 150-  
47 8935, Japan.  
48  
49

50 44  
51 45

52 46  
53 47

55 48 *Address for corresponding author*

56 49  
57 50  
58 51  
59 52  
60 53  
60 54  
60 55  
60 56  
60 57  
60 58  
60 59  
60 60  
60 61  
60 62  
60 63  
60 64  
60 65  
60 66  
60 67  
60 68  
60 69  
60 70  
60 71  
60 72  
60 73  
60 74  
60 75  
60 76  
60 77  
60 78  
60 79  
60 80  
60 81  
60 82  
60 83  
60 84  
60 85  
60 86  
60 87  
60 88  
60 89  
60 90  
60 91  
60 92  
60 93  
60 94  
60 95  
60 96  
60 97  
60 98  
60 99  
60 100

60 48 Kageaki Watanabe, MD.

1  
2  
3  
4  
5  
6 49 Department of Thoracic Oncology and Respiratory Medicine, Tokyo Metropolitan Cancer  
7  
8 50 and Infectious Diseases Center Komagome Hospital, Bunkyo, Tokyo 113-8677, Japan.

9  
10 51 E-mail: kageakiwatanabe@cick.jp; Tel: 03-3823-2101; Fax: 03-3823-5433  
11  
12

13 52

14  
15 53 Words: 3286  
16

17 54

18  
19 55 Figures: 1  
20  
21

22 56

23  
24 57 **Keywords:** Osimertinib, EGFR-TKI, progression pattern, subsequent treatment,  
25  
26 58 adherence, real-world data  
27

28  
29 59  
30  
31  
32  
33  
34  
35  
36  
37  
38  
39  
40  
41  
42  
43  
44  
45  
46  
47  
48  
49  
50  
51  
52  
53  
54  
55  
56  
57  
58  
59  
60

1  
2  
3  
4  
5  
6 **60 ABSTRACT**

7  
8 **61 Introduction:** Osimertinib, a third-generation epidermal growth factor receptor  
9  
10 **62 (EGFR)tyrosine kinase inhibitor (TKI), is widely used as the first-line treatment for EGFR**  
11  
12 **63 mutation-positive non-small cell lung cancer (NSCLC). Nevertheless, most cases**  
13  
14 **64 ultimately acquire resistance to osimertinib ultimately emerges, and no effective**  
15  
16 **65 treatment has been currently established for cases having progressive disease (PD) with**  
17  
18 **66 osimertinib. In clinical practice, EGFR-TKI therapy could be continued beyond RECIST**  
19  
20 **67 (response evaluation criteria in solid tumors)-defined PD cases when they are clinically**  
21  
22 **68 stable. Currently, the progression pattern of osimertinib and criteria for identifying**  
23  
24 **69 patients who might benefit from osimertinib beyond PD are unknown. In addition, the**  
25  
26 **70 efficacy and safety of osimertinib as the first-line treatment in real-world clinical practice**  
27  
28 **71 remain unclear in Japan. This multicenter study was designed to evaluate the real-world**  
29  
30 **72 data on first-line osimertinib and its post-treatment.**  
31  
32  
33  
34  
35  
36

37 **74 Methods and analysis:** The study enrolls patients with EGFR mutation-positive,  
38  
39 **75 advanced or recurrent NSCLC who received EGFR-TKI as the first-line therapy after**  
40  
41 **76 September 1, 2018, from October 2019 to August 2020, and those started on osimertinib**  
42  
43 **77 will be followed up until August 2022. We will evaluate the efficacy and safety of the first-**  
44  
45 **78 line osimertinib treatment, adherence to it, progression patterns on RECIST PD, and**  
46  
47 **79 subsequent treatment.**  
48  
49  
50

51 **80**  
52  
53 **81 Ethics and dissemination:** All participating patients will provide written informed  
54  
55 **82 consent before entering the study. The protocol, amendments, and patients' informed**  
56  
57 **83 consent forms will be approved before study commencement by the institutional review**  
58  
59  
60

1  
2  
3  
4  
5  
6 84 board or independent ethics committee at each participation site (Lead Ethics Committee.  
7  
8 85 Japan Red Cross Medical Center (26/04/2019, Order No. 976)) Patients will be  
9  
10 86 anonymized before registration into the study and their anonymized data will be collected  
11  
12 87 from the case report form. The results of this study will be presented at the national and  
13  
14 88 international conferences and submitted for publication.  
15  
16  
17  
18

19 89

20 90 **Trial registration number:** UMIN000038683  
21

22 91

23  
24 92 **Keywords:** Osimertinib, EGFR-TKI, progression pattern, subsequent treatment,  
25  
26 93 adherence, real-world data  
27  
28  
29

30 94

31 95

32 96

33 97

### 34 98 **Strengths and limitations of this study**

35  
36  
37  
38  
39 99 •The strength of this study is that it is the first large, multicenter study in Japan to  
40  
41 100 investigate osimertinib as the first-line treatment in real-world clinical practice.  
42  
43

44 101 •This study confirms the progression pattern of osimertinib and examines the optimal  
45  
46 102 subsequent treatment.  
47

48 103 •The factors that make osimertinib less effective will be analyzed by identifying  
49  
50 104 medication adherence.  
51

52 105 •The classification of the progression pattern in this study is yet to be validated.  
53

54 106 •End points with small number of events might not be adequately analyzed.  
55  
56  
57

58 107  
59  
60

1  
2  
3  
4  
5  
6 108 **TEXT**

7  
8 109 **INTRODUCTION**

9  
10 110 Lung cancer is the most leading cause of cancer deaths in developed countries,  
11 including Japan. In Japan, non-small cell lung cancer (NSCLC) accounts for  
12 approximately 85% of all lung cancers, and among non-small cell cancers, approximately  
13 111 approximately 85% of all lung cancers, and among non-small cell cancers, approximately  
14 112 approximately 85% of all lung cancers, and among non-small cell cancers, approximately  
15 113 45% of adenocarcinomas are known to have activating mutations of the epidermal  
16 114 growth factor receptor (EGFR) gene. [1] Patients with advanced or recurrent NSCLC with  
17 115 EGFR mutations have been reported to be highly responsive to first- and second-  
18 116 generation EGFR-tyrosine kinase inhibitors (TKIs); however, they become resistant to  
19 117 EGFR-TKIs, and the median progression-free survival with EGFR-TKI is approximately  
20 118 9–14 months.[2-5]

21  
22 119 Notably, approximately half of the resistance was determined to be because of the  
23 120 acquired T790M mutation, [6] and Osimertinib, a third-generation EGFR-TKI, was noted  
24 121 to be effective against T790M mutation-positive lung cancer and was initially established  
25 122 as the standard treatment for T790M mutation-positive lung cancer.[7] More recently,  
26 123 osimertinib has been shown to provide a significantly longer progression-free survival  
27 124 (PFS) and longer overall survival (OS) than the first-generation EGFR-TKI as the first-  
28 125 line treatment for EGFR mutation-positive NSCLC, which has been noted to be more  
29 126 effective and provided a longer PFS than the second-generation EGFR-TKI. [8,9]  
30 127 Currently, osimertinib is widely used as the first-line treatment for EGFR mutation-  
31 128 positive NSCLC with or without T790M mutation.

32  
33 129 We have previously studied EGFR mutation-positive NSCLC in Japanese patients  
34 130 treated with first- and second-generation EGFR-TKIs, such as gefitinib, erlotinib, and  
35 131 afatinib after being diagnosed as progressive disease (PD) per the RECIST criteria. [10]  
36  
37  
38  
39  
40  
41  
42  
43  
44  
45  
46  
47  
48  
49  
50  
51  
52  
53  
54  
55  
56  
57  
58  
59  
60



1  
2  
3  
4  
5  
6 132 In that study, when RECIST PD was determined, several patients were not clinically PD,  
7  
8 133 and 35% of patients continued to receive EGFR-TKI. The median time from RECIST PD  
9  
10 134 to clinical PD or discontinuation of EGFR-TKI was 5 months, and no major differences  
11  
12 135 were observed regarding OS or survival after PD with RECIST related to continuing  
13  
14 136 EGFR-TKI treatment beyond PD than stopping EGFR-TKI treatment during RECIST PD.  
15  
16 137 Because several patients are clinically stable even after being diagnosed as RECIST  
17  
18 138 PD, EGFR-TKI therapy is often continued beyond PD in clinical practice. Moreover, it  
19  
20 139 has been reported that the addition of radiotherapy to EGFR-TKI could have favorable  
21  
22 140 outcomes, [11-15] if the progression site is limited to brain metastases only. [16,17]

23  
24  
25  
26 141 Most cases receiving osimertinib also ultimately acquire resistance to it, with the  
27  
28 142 median PFS of 19 months. [8] However, currently, no effective treatment has been  
29  
30 143 established for PD after osimertinib. In the Japanese subset of the FLAURA study, PFS  
31  
32 144 was prolonged with osimertinib compared to first-generation TKIs, but its initial  
33  
34 145 superiority in OS disappeared in the middle of the curve, which may be because of the  
35  
36 146 post-treatment effect of the first-line TKIs. [18]

37  
38  
39 147 Clinicians have to decide when observing PD to osimertinib whether to discontinue or  
40  
41 148 continue the drug, or to switch to cytotoxic anticancer drug. Hence, information regarding  
42  
43 149 the progression pattern at the time of PD would be useful in deciding the optimal  
44  
45 150 treatment after osimertinib resistance. Yang et al. reported that the clinical mode of  
46  
47 151 failure of EGFR-TKIs can favor strategies for subsequent treatment and predict survival  
48  
49 152 benefit in advanced NSCLC. [19] Progression patterns to TKIs could be divided into  
50  
51 153 progression of brain metastasis alone, progression of oligometastasis, systemic  
52  
53 154 progression,[20] progression on imaging alone, and clinical PD.[10] Per the former  
54  
55 155 classification, patients with brain metastasis alone or oligometastatic progression could  
56  
57  
58  
59  
60

1  
2  
3  
4  
5  
6 156 continue osimertinib treatment with the addition of local therapy, [16,17] and in the latter  
7  
8 157 classification, patients without clinical PD might continue osimertinib treatment beyond  
9  
10 158 PD. However, currently, the progression patterns of osimertinib are not investigated, and  
11  
12  
13 159 neither the clinical relevance of “osimertinib beyond PD” nor criteria for identifying  
14  
15 160 patients who would benefit from it is known. In addition, the efficacy and safety of  
16  
17 161 osimertinib as the first-line treatment in real-world clinical practice remains to be fully  
18  
19 162 established in Japan, as is shown in the FLAURA Japanese subset data.

20  
21  
22 163 In this study, we will survey the choice of EGFR-TKIs used as the first-line therapy in  
23  
24 164 patients with advanced or recurrent EGFR mutation-positive NSCLC, and evaluate the  
25  
26 165 efficacy and safety of osimertinib treatment in clinical practice, the progression patterns  
27  
28 166 in RECIST PD with osimertinib, and subsequent treatment. In addition, we will examine  
29  
30 167 the factors that make osimertinib less effective by identifying medication adherence.  
31  
32  
33 168 [21,22]

34  
35 169

## 36 37 170 **METHODS and ANALYSIS**

### 38 39 171 **Design**

40  
41  
42 172 This observational study is a multicenter, prospective cohort study involving patients  
43  
44 173 with EGFR mutation-positive advanced or recurrent NSCLC in Japan. The study does  
45  
46 174 not include any particular intervention, patients will be managed using routine clinical  
47  
48 175 care, and all treatments and examinations will be performed as in regular practice. The  
49  
50 176 study will periodically survey and collect data on the registered patients using medical  
51  
52 177 records. Overall, 35 institutions in Japan, including cancer centers, university hospitals,  
53  
54 178 and community hospitals, participated in the study.  
55  
56  
57  
58 179

## 180 **Patient and public involvement**

181 There is no patient and public involved in the study. In principle, the results of the study  
182 will be disclosed if the research participant wishes to disclose the results of the study.

## 184 **Study period**

185 The study will be conducted from October 2019 to June 2023. Registration will take  
186 place from the approval date of ethical review at each institution to August 2020. The  
187 follow-up period will extend until August 2022 (2 years after the last patient was enrolled).  
188 Data entry and analysis will be completed by June 2023 (10 months after the last patient  
189 is observed).

## 191 **Participants**

192 Patients will be included in the study if they are aged  $\geq 20$  years and have advanced  
193 or recurrent metastatic NSCLC (the stage will be defined based on the UICC  
194 International Union for Tumors Lung Classifications [2017, 8th Edition]) that is EGFR  
195 activating mutation-positive. Recurrent metastatic NSCLC is defined as patients who  
196 cannot be treated with local treatments alone and require systemic chemotherapy with  
197 EGFR-TKIs. Notably, any type of EGFR mutation will be acceptable. In addition to Exon  
198 19 deletion and Exon 21 L858R susceptibility gene mutations (common mutations), rare  
199 EGFR mutations (uncommon mutations) will be eligible. Moreover, an additional  
200 eligibility criterion will be for patients to have started their first EGFR-TKI treatment on or  
201 after September 1, 2018.

202 Regarding EGFR-TKI treatment, patients who used anticancer drugs as local therapy  
203 like pleurodesis, patients treated with cytotoxic chemotherapy as prior therapy, patients

1  
2  
3  
4  
5  
6 204 treated with EGFR-TKIs and other anticancer drugs or angiogenesis inhibitors, patients  
7  
8 205 who were primarily treated with EGFR-TKI as monotherapy and alternating between  
9  
10 206 EGFR-TKI and other anticancer drugs, and patients who were enrolled in other clinical  
11  
12 207 trials will also be deemed eligible.

13  
14  
15 208 Patients who had started EGFR-TKI treatment before September 1, 2018, and patients  
16  
17 209 deemed inappropriate for inclusion by each investigator will be excluded.

18  
19  
20 210

### 21 211 **Research procedures**

22  
23  
24 212 The investigators will select patient candidates, obtain written informed consent,  
25  
26 213 complete the case registration form, and fax it to the data center. The data center will  
27  
28 214 verify the patient's eligibility and register the patient based on the case registration form.

29  
30 215 The patients will be classified into two groups based on the data provided at enrollment  
31  
32 216 (figure 1). One group will comprise patients treated or to be treated with EGFR-TKI other  
33  
34 217 than osimertinib, and patients treated or to be treated with osimertinib in combination  
35  
36 218 with other anticancer drugs or angiogenesis inhibitors from the beginning of treatment.

37  
38 219 The other group will comprise patients who started or will start osimertinib monotherapy.  
39  
40 220 Patients who have been receiving combination therapy with other anticancer drugs or  
41  
42 221 angiogenesis inhibitors during the course of osimertinib treatment or who have been  
43  
44 222 receiving replacement therapy with other anticancer drugs will be included in this group  
45  
46 223 provided they were initially treated with osimertinib monotherapy.

47  
48  
49 224 For the first group, the study will be completed at the time of enrollment survey with  
50  
51 225 confirmation of patient characteristics, details of EGFR-TKI therapy, and concomitant  
52  
53 226 drugs before initiation of EGFR-TKI therapy. In the second group, the study will continue  
54  
55 227 survey until the end of the study period. Each survey will include treatment details,  
56  
57  
58  
59  
60

1  
2  
3  
4  
5  
6 228 concomitant medications, imaging assessments, clinical exacerbations, flare events,  
7  
8 229 adverse event reports, outcomes, and post-treatment details after osimertinib treatment.  
9  
10 230 The investigators will conduct a simultaneous survey once every 6 months, using  
11  
12 231 medical records from enrolled patients. The final survey will be conducted 2 years after  
13  
14 232 the last patient was enrolled. The results of each study will be recorded in a continuing  
15  
16 233 case report form for each study and sent to the data center.  
17  
18

19 234 Patient-reported osimertinib compliance survey will be conducted in patients who were  
20  
21 235 started newly on osimertinib since the start of the study. Patients will be given a  
22  
23 236 medication notebook, which they will fill out themselves, and a copy of the notebook will  
24  
25 237 be mailed to the data center 180 days after starting osimertinib with a medication  
26  
27 238 investigation report for each patient.  
28  
29

30 239 All adverse events occurring during osimertinib treatment that are suspected to be  
31  
32 240 related to the treatment will be documented in the continuing case report form, regardless  
33  
34 241 of the severity. In the event of a serious adverse event, the standard reporting protocol  
35  
36 242 of a serious adverse event will be performed appropriately, including reporting to the  
37  
38 243 head of the medical institution and the authorities. In addition to that, the study mandates  
39  
40 244 that the report be emailed to the administrative office within 24 hours and the primary  
41  
42 245 report be emailed to the administrative office within 72 hours, using the “Emergency  
43  
44 246 Adverse Event Notification Form.” Finally, the administrative office will report the serious  
45  
46 247 adverse event to the principal investigator of the study and AstraZeneca through email.  
47  
48  
49

50  
51 248

#### 52 53 249 **Data management and monitoring**

54  
55 250 Data will be centrally managed at the designated data center. Central monitoring will  
56  
57 251 be performed to ensure that the study is conducted safely and in accordance with the  
58  
59  
60

1  
2  
3  
4  
5  
6 252 protocol.

7  
8 253

9  
10 254 **End point**

11  
12 255 This study's primary endpoint is co-primary endpoint. First primary endpoint is PFS of  
13 osimertinib, time from the start of osimertinib to RECIST PD, or death from any cause.

14  
15 256 Another primary endpoint is percentage of patients with progression patterns listed below

16  
17 257 when RECIST PD was encountered with osimertinib treatment. This progression pattern

18  
19 258 classification was modified from the paper by Goto Y et al [10]; however, this is yet to be

20  
21 259 fully validated. Progression patterns are classified into nine categories (3 x 3) based on

22  
23 260 progression site and patient status as follows:

24  
25 261 A. Progression patterns based on progression sites

26  
27 262 (A1) Central nervous system only (including brain metastasis and carcinomatous  
28 meningitis)

29  
30 263 (A2) Oligometastasis (one to three lesions in one organ other than the brain)

31  
32 264 (A3) Progression in multiple organs (except A1 and A2)

33  
34 265 B. Symptoms at exacerbation and exacerbation patterns per the patient's general  
35 condition

36  
37 266 (B1) Asymptomatic, without progression as defined by B3 (This pattern is applied when a  
38 patient has PD on RECIST due to the appearance of a new lesion or the enlargement of a  
39 target or non-target lesion, but the appearance or enlargement of the lesion is asymptomatic  
40 and the patient has no symptoms.)

41  
42 267 (B2) Symptomatic, without progression as defined by B3

43  
44 268 (B3) Decreased PS or major organ threatening conditions (cancerous lymphangitis, bone  
45 marrow metastasis, carcinomatous meningitis, hepatic metastasis with hepatic disorder,  
46  
47 269  
48  
49 270  
50  
51 271  
52  
53 272  
54  
55 273  
56  
57 274  
58  
59 275  
60

1  
2  
3  
4  
5  
6 276 etc.)

7  
8 277 The study has several secondary endpoints, which are listed below.

9  
10 278 1. Response rate of osimertinib in patients with measurable lesions.

11  
12 279 2. OS (time from the start of osimertinib to the date of death, irrespective of cause of  
13  
14 280 death).

15  
16 281 3. Percentage of patients who continued or discontinued osimertinib at RECIST PD.

17  
18 282 4. Number and type of drugs prescribed concomitantly with osimertinib (polypharmacy):

19  
20 283 oral drugs are classified and aggregated according to the type (gastrointestinal,

21  
22 284 antihypertensive, diabetic, etc.) and number (less than 5, 5–9, 10, or more).

23  
24 285 5. Osimertinib adherence (survey of actual conditions using the medication handbook).

25  
26 286 6. Duration of osimertinib treatment.

27  
28 287 7. Percentage of patients who experienced flare, defined as rapid disease deterioration

29  
30 288 within 1 month resulting in hospitalization or death, after discontinuation of osimertinib

31  
32 289 treatment, except in cases of infections, venous thrombosis, and other causes not

33  
34 290 directly related to NSCLC exacerbation. [10]

35  
36 291 8. Percentage of patients receiving concurrent chemotherapy or radiotherapy along with

37  
38 292 osimertinib after osimertinib PD.

39  
40 293 9. Percentage of patients who received chemotherapy after discontinuation of

41  
42 294 osimertinib treatment.

43  
44 295 10. Percentage of patients re-administered osimertinib after more than 4 weeks of

45  
46 296 discontinuation (if it is less than 4 weeks, it will be considered to be temporary interruption

47  
48 297 rather than discontinuation).

49  
50 298 11. Percentage of patients with advanced or recurrent EGFR mutation-positive NSCLC

51  
52 299 receiving osimertinib as initial therapy after September 2018 when osimertinib was

1  
2  
3  
4  
5  
6 300 approved for use in patients with NSCLC untreated with EGFR-TKI in Japan.  
7

8 301 12. Effects of osimertinib in patients with uncommon EGFR mutations.  
9

10 302 13. Incidence of grade 3 or higher adverse events with osimertinib treatment.  
11

12 303 14. Incidence of pneumonitis caused by osimertinib.  
13

14 304 Effects of osimertinib in patients with uncommon EGFR mutations will be analyzed  
15

16 305 within secondary endpoint 12, and other efficacy endpoints will be analyzed for common  
17

18 306 EGFR activating mutations.  
19

20 307 In addition, we will also perform exploratory analysis to investigate the content and  
21

22 308 efficacy of post-treatment after Osimertinib PD.  
23

24 309  
25

26 310 **Sample size**  
27

28 311 Between September 2018 and August 2020, 700 patients were expected to be  
29

30 312 enrolled from 50 potential participating institutions. Of the 700 patients, the proportion of  
31

32 313 osimertinib was estimated to be 70% on average over 2 years, and the number of  
33

34 314 patients treated with osimertinib was considered to be 500. Based on previous clinical  
35

36 315 trial data, the median PFS for osimertinib is expected to be about 19 months. The study  
37

38 316 has a 2-year enrollment period and a follow-up period of 2 years from the last patient's  
39

40 317 enrollment. Therefore, all 500 patients will be followed up for more than 2 years. For  
41

42 318 PFS, which is one of the primary endpoints, we would expect events to occur in more  
43

44 319 than 60% of cases (number of events was 361, assuming a constant rate of enrollment  
45

46 320 over 2 years, minimum follow-up of 2 years, and an exponential distribution of median  
47

48 321 PFS of 19 months), and we believe that one of the primary endpoints, that is, the pattern  
49

50 322 of exacerbations, could be evaluated.  
51

52 323  
53  
54  
55  
56  
57  
58  
59  
60



## 324 **Data analysis**

325 All efficacy analyses will be based on the full analysis set (and per protocol set for  
326 supportive analysis). The results of all statistical analyses will be performed using 95%  
327 confidence intervals and two-sided  $p$  values. Final analyses will be performed for all  
328 endpoints after the data have been finalized after the final investigation.

329 PFS, OS, and duration of osimertinib treatment will be summarized using Kaplan-  
330 Meier methods, and 95% confidence interval of median time will be calculated using  
331 Brookmeyer and Crowley based on the log-log transformation of survival function. For  
332 PFS, we will perform subgroup analyses for the following covariates: gender (male,  
333 female), age ( $\geq 65$  years,  $<65$  years), primary disease (clinical stage, histology,  
334 metastatic organ), smoking history (yes, no), PS (0, 1), types of EGFR mutations,  
335 provided there is a certain number of events in each category. Regarding the percentage  
336 of patients with nine progression patterns as the primary endpoint, the percentage of  
337 response rate and the percentage of patients with various secondary endpoints, the ratio  
338 and the 95% confidence interval of Clopper-Pearson will be calculated.

339

## 340 **Ethics and dissemination**

341 This study will be conducted per the principles of the Declaration of Helsinki and the  
342 Ethical Guidelines for Medical and Health Research Involving Human Subjects. All  
343 participating patients will provide written informed consent before entering the study.  
344 However, informed consent will not be required for patients who are dead at the time of  
345 registration. The protocol, amendments, and patient informed consent forms will be  
346 approved by the institutional review board or the independent ethics committee at each  
347 participating site before study commencement. (Lead Ethics Committee. Japan Red

1  
2  
3  
4  
5  
6 348 Cross Medical Center (26/04/2019, Order No. 976))  
7

8 349 Furthermore, for data management and to ensure patient privacy, patients will be  
9  
10 350 anonymized before registration and their anonymized data will be collected using the  
11  
12 351 case report form. All personnel involved in the study will ensure confidentiality of all  
13  
14 352 participating patients. The anonymization procedure planned is as follows: the  
15  
16 353 investigators at each institution will give each participating patient an original number  
17  
18 354 unique to the institution that is unrelated to the name and hospital ID of the patient, and  
19  
20 355 register the patient in the data center using that original number. Subsequently, the data  
21  
22 356 center will assign a registration number for this study. Each institution will prepare a list  
23  
24 357 of correspondence between the original number of the institution and the registration  
25  
26 358 number of this study, which will be strictly controlled by the institution. Enrolled patients  
27  
28 359 are identified and queried using the registration number of this study. Information that  
29  
30 360 can be used by a third party to directly identify a registered patient, such as the medical  
31  
32 361 record numbers in clinical practice or the names and contact details of a registered  
33  
34 362 patient, will not be provided to the data center and not be registered at the data center.  
35  
36 363 Data collected from patients in this study will not be used for any other purpose, and  
37  
38 364 potential information that discloses patient identity will not be published.  
39  
40  
41  
42  
43  
44  
45

46 365

## 47 366 **DISCUSSION**

48 367 This is the first study to evaluate the efficacy and safety of first-line osimertinib in real-  
49  
50 368 world clinical practice in Japan. Moreover, this study will determine the pattern of  
51  
52 369 exacerbation of osimertinib in RECIST PD and investigate and analyze the real-world  
53  
54 370 post-treatment. The study results will help identify the optimal treatment of patients with  
55  
56 371 EGFR mutation-positive NSCLC based on the real-world exacerbation patterns after  
57  
58  
59  
60

1  
2  
3  
4  
5  
6 372 first-line osimertinib treatment. The results of this study will be presented at the national  
7  
8 373 and international conferences and will be submitted for publication. We expect that all  
9  
10 374 the data obtained and analyzed by this study will facilitate improved treatment strategies  
11  
12  
13 375 in the future for patients with EGFR mutation-positive lung cancer.  
14  
15 376

16  
17  
18  
19  
20  
21  
22  
23  
24  
25  
26  
27  
28  
29  
30  
31  
32  
33  
34  
35  
36  
37  
38  
39  
40  
41  
42  
43  
44  
45  
46  
47  
48  
49  
50  
51  
52  
53  
54  
55  
56  
57  
58  
59  
60

For peer review only

1  
2  
3  
4  
5  
6 377 Figure 1 Study schema, EGFR, epidermal growth factor receptor  
7  
8 378  
9  
10  
11  
12  
13  
14  
15  
16  
17  
18  
19  
20  
21  
22  
23  
24  
25  
26  
27  
28  
29  
30  
31  
32  
33  
34  
35  
36  
37  
38  
39  
40  
41  
42  
43  
44  
45  
46  
47  
48  
49  
50  
51  
52  
53  
54  
55  
56  
57  
58  
59  
60

For peer review only

1  
2  
3  
4  
5  
6 379 **Acknowledgments:** The authors thank the Data and Safety Monitoring Committee Junji  
7  
8 380 Furuse and Toshimi Takano; the data center, Hiroshi Otsu and Akemi Yasuhara; and  
9  
10 381 Akira Yamao and Miho Akita of Public Health Research Center Comprehensive Support  
11  
12 382 Project for Oncology Research, the administrative office.  
13  
14

15 383

16  
17 384 **Contributors:** KW, KY, YH, KU, GN, KK, KU, YO, and HK conceived and designed the  
18  
19 385 study. KW, YH, and HK drafted the protocol of the study. KW, KY, YH, KU, GN, KK, KU,  
20  
21 386 YO, and HK refined the study protocol and study implementation. All authors have read  
22  
23 387 and approved the final version of the manuscript.  
24  
25

26 388

27  
28 389 **Financial Support:** This study is financially supported by AstraZeneca.  
29  
30

31 390

32  
33 391 **Disclaimer:** AstraZeneca will not be directly involved in the data management, source  
34  
35 392 data verification, or the statistical analysis.  
36  
37

38 393

39  
40 394 **Competing interests:** KW, KY, YH, KU, GN, KK, and HK have received personal fees  
41  
42 395 from AstraZeneca. KY and GN have received research grants from AstraZeneca.  
43  
44

45 396

46 397 **Ethics approval:** Institutional review board or independent ethics committee at each  
47  
48 398 participating site. (Lead Ethics Committee. Japan Red Cross Medical Center  
49  
50 399 (26/04/2019, Order No. 976))  
51  
52

53 400

54  
55 401 **Provenance and peer review:** Not commissioned; externally peer reviewed.  
56  
57

58 402  
59  
60

403 **References**

- 404 1. Midha A, Dearden S, McCormack R. EGFR mutation incidence in non-small-cell lung  
405 cancer of adenocarcinoma histology: a systematic review and global map by ethnicity  
406 (mutMapII). *Am J Cancer Res* 2015;5:2892–2911.
- 407
- 408 2. Maemondo M, Inoue A, Kobayashi K, et al. Gefitinib or chemotherapy for non-small-  
409 cell lung cancer with mutated EGFR. *N Engl J Med* 2010;362:2380–2388.
- 410
- 411 3. Mitsudomi T, Morita S, Yatabe Y, et al: Gefitinib versus cisplatin plus docetaxel in  
412 patients with non-small-cell lung cancer harbouring mutations of the epidermal growth  
413 factor receptor (WJTOG3405): an open label, randomised phase 3 trial. *Lancet Oncol*  
414 2010;11:121–128.
- 415
- 416 4. Zhou C, Wu YL, Chen G, et al. Erlotinib versus chemotherapy as first-line treatment  
417 for patients with advanced EGFR mutation-positive non-small-cell lung cancer  
418 (OPTIMAL, CTONG-0802): a multicentre, open-label, randomised, phase 3 study.  
419 *Lancet Oncol* 2011;12:735–742.
- 420
- 421 5. Rosell R, Carcereny E, Gervais R, et al. Erlotinib versus standard chemotherapy as  
422 first-line treatment for European patients with advanced EGFR mutation-positive non-  
423 small-cell lung cancer (EURTAC): a multicentre, open-label, randomised phase 3 trial.  
424 *Lancet Oncol* 2012;13:239–246.
- 425
- 426 6. Yu HA, Arcila ME, Rekhtman N, et al. Analysis of tumor specimens at the time of

- 1  
2  
3  
4  
5  
6 427 acquired resistance to EGFR-TKI therapy in 155 patients with EGFR-mutant lung  
7  
8 428 cancers. *Clin Cancer Res* 2013;19:2240–2247.  
9  
10 429  
11  
12  
13 430 7. Mok TS, Wu YL, Ahn MJ, et al. Osimertinib or platinum-pemetrexed in EGFR T790M-  
14  
15 431 positive lung cancer. *N Engl J Med* 2017;376:629–640.  
16  
17 432  
18  
19 433 8. Soria JC, Ohe Y, Vansteenkiste J, et al. Osimertinib in untreated EGFR-mutated  
20  
21 434 advanced non-small-cell lung cancer. *New Engl J Med* 2018;378:113–25.  
22  
23  
24 435  
25  
26 436 9. Ramalingam SS, Vansteenkiste J, Planchard D, et al. Overall Survival with  
27  
28 437 Osimertinib in Untreated, EGFR-Mutated Advanced NSCLC. *New Engl J Med*  
29  
30 438 2020;382:41–50.  
31  
32  
33 439  
34  
35 440 10. Goto Y, Tanai C, Yoh K, et al. Continuing EGFR-TKI beyond radiological progression  
36  
37 441 in patients with advanced or recurrent, EGFR mutation-positive non-small-cell lung  
38  
39 442 cancer: An observational study. *ESMO Open* 2017;2:e000214.  
40  
41  
42 443  
43  
44 444 11. Nishie K, Kawaguchi T, Tamiya A, et al. Epidermal growth factor receptor tyrosine  
45  
46 445 kinase inhibitors beyond progressive disease: A retrospective analysis for Japanese  
47  
48 446 patients with activating EGFR mutations. *J Thorac Oncol* 2012;7:1722–1727.  
49  
50  
51 447  
52  
53 448 12. Nishino K, Imamura F, Morita S, et al. A retrospective analysis of 335 Japanese lung  
54  
55 449 cancer patients who responded to initial gefitinib treatment. *Lung Cancer* 2013;82:299–  
56  
57 450 304.  
58  
59  
60

1  
2  
3  
4  
5  
6 451  
7

8 452 13. Nishino M, Cardarella S, Dahlberg SE, et al. Radiographic assessment and  
9  
10 453 therapeutic decisions at RECIST progression in EGFR-mutant NSCLC treated with  
11  
12 454 EGFR tyrosine kinase inhibitors. *Lung Cancer* 2013;79:283–288.

13  
14  
15 455

16  
17 456 14. Lo PC, Dahlberg SE, Nishino M, et al. Delay of treatment change after objective  
18  
19 457 progression on first-line erlotinib in epidermal growth factor receptor-mutant lung cancer.  
20  
21 458 *Cancer* 2015;121:2570–2577.

22  
23  
24 459

25  
26 460 15. Park K, Yu CJ, Kim SW, et al. First-line erlotinib therapy until and beyond response  
27  
28 461 evaluation criteria in solid tumors progression in Asian patients with epidermal growth  
29  
30 462 factor receptor mutation-positive non-small-cell lung cancer: The ASPIRATION Study.  
31  
32 463 *JAMA Oncol* 2016;2:305–312.

33  
34  
35 464

36  
37 465 16. Weickhardt AJ, Scheier B, Burke JM, et al. Local ablative therapy of oligoprogressive  
38  
39 466 disease prolongs disease control by tyrosine kinase inhibitors on oncogene-addicted non-  
40  
41 467 small-cell lung cancer. *J Thorac Oncol* 2012;7:1807–1814.

42  
43  
44 468

45  
46 469 17. Yu HA, Sima CS, Huang J, et al. Local therapy with continued EGFR tyrosine kinase  
47  
48 470 inhibitor therapy as a treatment strategy in EGFR-mutant advanced lung cancers that  
49  
50 471 have developed acquired resistance to EGFR tyrosine kinase inhibitors. *J Thorac Oncol*  
51  
52 472 2013; 8: 346–351.

53  
54  
55 473

56  
57  
58 474 18. Nogami N et al. Osimertinib as first-line therapy for EGFRm advanced NSCLC :  
59  
60



- 1  
2  
3  
4  
5  
6 475 Final FLAURA OS. The 60<sup>th</sup> Annual Meeting of the Japan Lung Cancer Society.  
7  
8 476  
9  
10 477 19. Jin-Ji Yang, Hua-Jun Chen, Hong-Hong Yan et al. Clinical modes of EGFR tyrosine  
11  
12 478 kinase inhibitor failure and subsequent management in advanced non-small cell lung  
13  
14 479 cancer. *Lung cancer* 2013;79:33-39.  
15  
16 480  
17  
18 481 20. Gandara DR, Li T, Lara PN et al. Acquired resistance to targeted therapies against  
19  
20 482 oncogene-driven non–small-cell lung cancer: approach to subtyping progressive disease  
21  
22 483 and clinical implications. *Clinical Lung Cancer* 2014;15:1–6.  
23  
24 484  
25  
26 485 21. Martin D, Bazeos A, Mahon FX, et al. Adherence is the critical factor for achieving  
27  
28 486 molecular responses in patients with chronic myeloid leukemia who achieve complete  
29  
30 487 cytogenetic responses on imatinib. *J Clin Oncol* 2010;28:2381–2388  
31  
32 488  
33  
34 489 22. Calip GS, Xiang S, Jun DH, et al. Polypharmacy and adherence to adjuvant  
35  
36 490 endocrine therapy for breast cancer. *J Oncol Pract* 2017;13:e451–e462  
37  
38  
39  
40  
41  
42  
43  
44  
45  
46  
47  
48  
49  
50  
51  
52  
53  
54  
55  
56  
57  
58  
59  
60

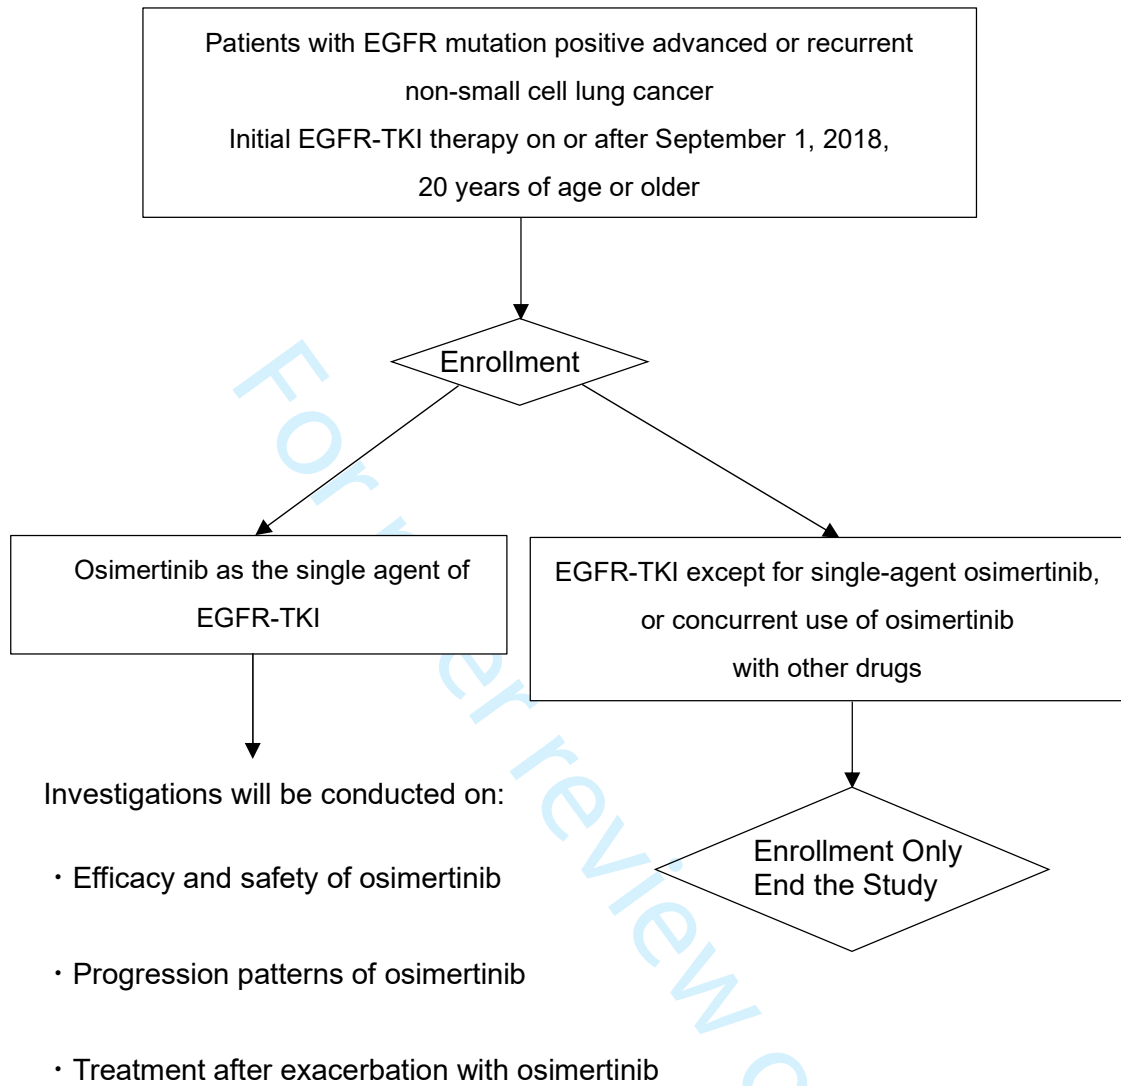

Supplement: bmjopen-2020-046451.draft_revisions.pdf [file bmjopen-2020-046451.draft_revisions.pdf]
